# Supplementary material
Source: Springer Nature journal article supplement (https://www.springermedizin.de/resource/supplementary/12885_2012_3959_MOESM3_ESM.pdf/9464880)

**a**

Yearly average cost

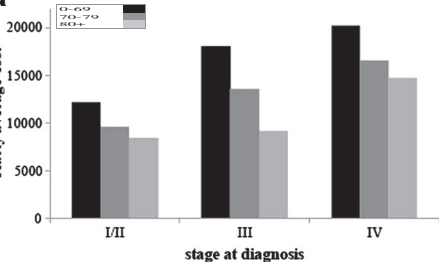**b**

Yearly average cost

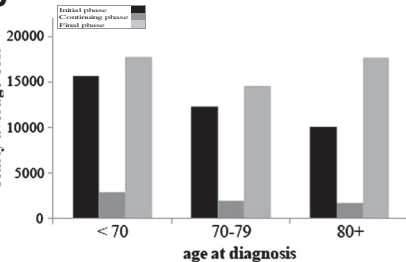

Supplement: MOESM3 [file 9464880]
